1 **Detection of SARs-CoV-2 in wastewater, using the existing**  
2 **environmental surveillance network: An epidemiological**  
3 **gateway to an early warning for COVID-19 in communities**  
4

5 Salmaan Sharif<sup>1</sup>, Aamer Ikram<sup>1</sup>, Adnan Khurshid<sup>1</sup>, Muhammad Salman<sup>1</sup>, Nayab Mehmood<sup>1</sup>,  
6 Yasir Arshad<sup>1</sup>, Jamal Ahmad<sup>2</sup>, Rana Muhammad Safdar<sup>3</sup>, Mehar Angez<sup>1</sup>, Muhammad Masroor  
7 Alam<sup>1</sup>, Lubna Rehman<sup>1</sup>, Ghulam Mujtaba<sup>1</sup>, Jaffar Hussain<sup>1</sup>, Johar Ali<sup>1</sup>, Ribqa Akthar<sup>1</sup>,  
8 Muhammad Wasif Malik<sup>1</sup>, Zeeshan Iqbal Baig<sup>1</sup>, Muhammad Suleman Rana<sup>1</sup>, Muhammad  
9 Usman<sup>1</sup>, Muhammad Qaisar Ali<sup>1</sup>, Abdul Ahad<sup>1</sup>, Nazish Badar<sup>1</sup>, Massab Umair<sup>1</sup>, Sana Tamim<sup>1</sup>,  
10 Asiya Ashraf<sup>1</sup>, Faheem Tahir<sup>1</sup>, and Nida Ali<sup>2</sup>.

11

- 12 1. National Institute of Health, Islamabad, Pakistan.  
13 2. World Health Organization, Islamabad, Pakistan.  
14 3. National Emergency Operations Centre for Polio Eradication, Islamabad, Pakistan

15

16 **Corresponding Author**

17 Salmaan Sharif  
18 Department of Virology,  
19 Public Health Laboratories Division,  
20 National Institute of Health,  
21 Islamabad, Pakistan.  
22 Email: [salmaansharif@hotmail.com](mailto:salmaansharif@hotmail.com)  
23 Tel: +92-301-2005000 / +92-51-8442662 (Ext: 110)

## 24 Abstract

### 25 Background:

26 The ongoing COVID-19 pandemic caused by SARs-CoV-2 was transmitted person to person via  
27 droplet infections and fecal-oral transmission. This illustrates the probability of environmentally  
28 facilitated transmission, mainly the sewage.

### 29 Method:

30 We used existing Pakistan polio environment surveillance network to investigate presence of  
31 SARs-CoV-2 using three commercially available kits and E-Gene detection published assay for  
32 surety and confirmatory of positivity. A Two-phase separation method is used for sample  
33 clarification and concentration. An additional high-speed centrifugation (14000Xg for 30 min)  
34 step was introduced, prior RNA extraction, to increase viral RNA yield resulting a decrease in  
35 *Cq* value.

### 36 Results:

37 A total of 78 wastewater samples collected from 38 districts across Pakistan, 74 wastewater  
38 samples from existing polio environment surveillance sites, 3 from drains of COVID-19 infected  
39 areas and 1 from COVID 19 quarantine center drainage, were tested for presence of SARs-CoV-  
40 2. 21 wastewater samples (27%) from 13 districts turned to be positive on RT-qPCR. SARs-COV-  
41 2 RNA positive samples from areas with COVID patients and COVID 19 patient quarantine  
42 center drainage strengthen the findings and use of wastewater surveillance in future.  
43 Furthermore, sequence data of partial ORF 1a generated from COVID 19 patient quarantine  
44 center drainage sample also reinforce our findings that SARs-CoV-2 can be detected in  
45 wastewater.

### 46 Discussion:

47 This study finding indicates that SARs-CoV-2 detection through wastewater surveillance has an  
48 epidemiologic potential that can be used as early warning system to monitor viral tracking and  
49 circulation in cities with lower COVID-19 disease burden or heavily populated areas where  
50 door-to-door tracing may not be possible. However, attention needed on virus concentration  
51 and detection assay to increase the sensitivity. Development of highly sensitive assay will be an  
52 indicator for virus monitoring and to provide early warning signs.

## 53 Introduction:

54 Novel coronavirus pneumonia (COVID-19) caused by SARS-Cov-2 infection has become a global  
55 emergency through its widespread infection with 6,189,560 confirmed cases resulting 372,469  
56 deaths in 213 countries as of 1<sup>st</sup> June , 2020 (JHU 2020). In December 2019, cluster of  
57 pneumonia like disease cases with symptoms including fever, difficulty in breathing, cough and  
58 invasive lesion on both lungs were reported from Wuhan, China (WHO 2020a). The causative  
59 agent was identified as a Severe acute respiratory syndrome coronavirus 2 (SARS-CoV-2) after  
60 ruling out SARS-CoV, MERS-CoV, influenza, avian influenza, adenovirus and other common  
61 respiratory pathogens (WHO 2020b). Coronaviruses belonging to family *Cornaviridae* are  
62 enveloped, non-segmented positive sense RNA viruses distributed in human and mammals  
63 (Richman DD 2016). However, majority of human coronaviruses have mild infections but two  
64 betacoronaviruses; severe acute respiratory syndrome coronavirus (SARS-CoV) and Middle East  
65 respiratory syndrome coronavirus (MERS-CoV) caused outbreaks in last two decades with 10%  
66 and 35.6% mortality rate respectively (de Groot et al. 2013; Hui et al. 2004; Ramadan and Shaib  
67 2019).

68 . On March 11, 2020 WHO declared it as pandemic, when disease was reported in 114 countries  
69 (WHO 2020c). The primary routes of viral transmission (SARS-CoV-2) was considered to be  
70 through droplet infections and person to person close contact, but later it is evident from  
71 various published studies that there is increasing possibility of fecal-oral transmission (Adhikari  
72 et al. 2020; Cheng et al. 2004). This shows the probability of environmentally mediated  
73 transmission. Since the early days of pandemic, we got interested in understanding and utilizing  
74 the role of environmental sampling mainly the sewage.

75 SARS-CoV-2 resembles 82% with SARS coronavirus (SARS-CoV) which caused an outbreak in  
76 2003. Studies have shown the survival of SARS-CoV in stool for up to 4 days (Hui et al. 2004).  
77 Another study described the presence of SARS-CoV and its infectious nature in water and  
78 sewage for days to weeks (Casanova et al. 2009). It was also described that faulty sewage  
79 system contaminated with SARs-CoV in a high-rise housing estate of Hong Kong during 2003  
80 was linked to SARS outbreak involving large number of residents of surrounding buildings (Peiris  
81 et al. 2003). A recent study highlighted the shedding through stool of SARS-CoV-2 in cluster of 9

82 nCOVID-19 patients. It was reported that that the RNA concentration decreased from  $10^7$  RNA  
83 copies/g to  $10^3$  RNA copies/g after one week of symptom onset to third week (Roman Woelfel  
84 2020). Since the source of transmission of SARS-CoV-2 is still unknown therefore wastewater  
85 transmission pathway can become an important mode (UNICEF 2020). Hence, the presence of  
86 SARS-CoV-2 in contaminated sewage sample and its role in transmission needs to be  
87 investigated. In this study, we used the existing polio environment surveillance network in  
88 Pakistan through which sewage samples were collected from designated sites in different  
89 districts of the country to investigate presence of poliovirus, its spread and molecular  
90 epidemiology. Same samples were processed and tested for detection of SARS-CoV-2 RNA.

## 91 Methods

92 Untreated wastewater samples (sewage samples) selected for testing in this study were  
93 collected using the grab sampling technique. Most of them were those collected for routine  
94 polio environment surveillance (ES). Polio ES sites are either open drains or pumping stations  
95 and are sampled routinely on monthly basis. Each sampling site represent 100,000 – 300,000  
96 population (WHO 2015). Besides, wastewater from drains of some areas with recent history of  
97 SARS-CoV2 cases were also collected for detection and re-confirmation of SARS-CoV-2  
98 detection. Sampling personnel strictly followed the standard safety guidelines for personnel  
99 protective equipment (PPE) required for wastewater sampling. One liter of sewage water was  
100 collected from the mid-stream into a sterile, leak proof container at a downstream sampling  
101 site during the peak morning flow. These samples were transported in properly sealed  
102 container with information form, indicating sampling site, district, sampling date and sampling  
103 time, to laboratory within 48 hours of collection maintaining reverse cold chain (WHO 2015).  
104 Samples were processed in laboratory for virus concentration using the two-phase separation  
105 method (WHO 2003).

106 500 ml of each raw sewage specimens was concentrated. Firstly, clarification of the sample  
107 was done by pelleting of larger suspended solids by high speed centrifugation. The clarified  
108 sewage sample was mixed with defined amounts of polymers, dextran and polyethylene  
109 glycol (PEG). The homogenous mixture obtained by vigorous shaking is left to stand  
110 overnight at 4°C in a separation funnel. The polymer helped to form two distinct layers

111 (phases) in the funnel which were collected and mixed with pellet formed in first step which  
112 was then treated with chloroform (WHO 2003) and further used for extraction of RNA.

113 Before proceeding directly for RNA extraction, an additional step was introduced to increase  
114 the yield of RNA, in contrast with direct processing. 400µl of processed sample was  
115 centrifuged at high speed (14000Xg) for 30 min to pellet the suspended solid particles. Virus  
116 may be partly bound to these solids. Supernatant was discarded carefully without disturbing  
117 the pellet, which was later used for RNA extraction.

118 Spin star viral nucleic acid kit 1.0 (ADT Biotech, Phileo Damansara 1, Petaling Jaya Part No.  
119 811803) was used to extract the viral RNA. Internal control provided with kits were added as an  
120 amplification control in rRT-PCR. Pellet was dissolved with 430µl of lysis buffer supplied with  
121 kit, followed by 5 min vortexing to homogenously dissolve the pallet. Further processing was  
122 done as per the manufacturer's instructions. The final elution volume is 60µl. The extracted  
123 viral RNA was store at -20°C till further testing.

124 Multiple qualitative reverse transcription real-time PCR kits for identification of SARS-CoV2  
125 were used. These kits were already in use country wide for detection of SARS-CoV2 in human.  
126 These were (Kit 1) Real-Time Fluorescent RT-PCR Kit for detecting 2019-nCoV by BGI China (IVD  
127 &CE marked; Catalogue No. MFG030010), takes ORF 1ab gene as the target domain, (Kit 2) qRT-  
128 PCR for Novel Coronavirus (2019-nCoV) Nucleic Acid Diagnostic Kit (PCR-Flourescence Probing,  
129 IVD marked) by Sansure Biotech (Sansure Biotech Inc China, Ref No. S3102E). The kit utilizes  
130 novel coronavirus (2019-nCoV) ORF-1 gene and a conserved coding nucleocapsid protein N-  
131 gene as the target regions and finally (Kit 3) detection Kit for 2019 Novel Coronavirus RNA (PCR-  
132 Fluorescence Probing) targeting the ORF 1ab and N gene of SARS-CoV-2/2019-nCoV by Da An  
133 Gene Co., China (IVD and CE marked; Catalogue No. DA-930). Thermal cycling and results  
134 interpretation were performed as per manufacturer's instruction.

135 For further confirmation these samples were also tested for envelop protein (E) gene detection  
136 using the primers / probe sets that was published by Corman V. M. et. al. (Corman et al. 2020).  
137 A 25µl reaction contain 5 µl RNA, 12.5 µl 2x reaction buffer provided with the Superscript III  
138 one step RT-PCR with platinum Taq Polymerase (Invitrogen, Darmstadt, Germany; containing

139 0.4 mM of each deoxyribose triphosphates (dNTP) and 3.2 mM magnesium sulphate), 1 µl of  
140 reverse transcriptase / Taq mixture from Kit and different concentration of primers and probes  
141 (Table 1). Thermal cycling was carried out at 55°C for 10 min, followed by 95°C for 3min. Then  
142 45 cycles of 95°C for 15 sec, 58°C for 30 sec on ABI 7500 real time system (Applied Bio Systems,  
143 US. Cat # 4351104).

144 Genetic sequencing was based on conventional amplification of genomic RNA by using Qiagen  
145 One step RT PCR kit as described by Shirato K et al (Shirato et al. 2020). The ORF 1a gene was  
146 amplified, using a pair of primers NIID\_WH-1\_F501 (TTCGGATGCTCGAACTGCACC) and  
147 NIID\_WH-1\_R913 (CTTTACCAGCACGTGCTAGAAGG). After 1st PCR, nested PCR was performed  
148 using 2nd PCR primers (Sense: NIID\_WH-1\_F509(CTCGAACTGCACCTCATGG), Antisense:  
149 NIID\_WH-1\_R854 CAGAAGTTGTTATCGACATAGC) and 1µl of 1st PCR product under the same  
150 condition. PCR amplicons from 2nd round were purified by Qiaquick PCR purification Kit  
151 (Qiagen, Germany) and directly sequenced by using Sequencing primers (Sense: NIID\_WH-  
152 1\_Seq\_F519 ACCTCATGGTCATGTTATGG, Antisense: NIID\_WH-1\_Seq\_R840  
153 GACATAGCGAGTGTATGCC) on ABI 3100 genetic analyzer using Big Dye Terminator kit  
154 V.3.0.cycle sequencing kit (ABI Foster City Canada, USA). The nucleotide sequences were  
155 assembled, edited and analyzed by Sequencher software v.4.9 (GeneCodes Incorporation, USA).  
156 The nucleotide sequence obtained was blasted against the available NCBI databank  
157 (<https://blast.ncbi.nlm.nih.gov/Blast.cgi>).

## 158 Results:

159 A total of 78 wastewater samples were collected between 12 to 18 epidemiological weeks from  
160 38 districts across country and were tested for SARs-CoV-2 RNA. 21 wastewater samples (27%)  
161 from 13 districts were positive on RT-qPCR (Table 2).

162 Primarily, 20 wastewater samples were collected during March 20, 2020 to April 09, 2020 from  
163 17 districts of Pakistan; 18 samples from different polio environmental sites (ES) distributed  
164 across 16 districts and 02 samples in areas with recent history of SARS-CoV2 cases from capital  
165 city Islamabad. All these samples were tested against the three commercially available SARS-  
166 CoV-2 RNA detection diagnostic kits (mentioned under materials and methods). Negative  
167 control supplied with the diagnostic kits containing the internal control was added in each

168 sample during extraction to ensure none of the wastewater extracted RNA samples had RT-  
169 qPCR inhibition. A total of 6 samples (30 %) were positive for SARs-CoV-2 RNA, out of these all  
170 were detected on Kit 1, 2 (either one gene positive or both, results interpreted as per  
171 manufacturer's instruction) and E gene method whereas only 4 were positive on Kit 3 (Table 2).  
172 4 positive samples had *C<sub>q</sub>* values between 32 to 38, whereas remaining 2 samples collected in  
173 areas with history of SARs-CoV-2 cases from Islamabad were positive on all three diagnostic kits  
174 and E gene method having *C<sub>q</sub>* between 36 to 38 (Table 3).

175 A centrifugation step was also introduced before Viral RNA extraction to increase viral RNA  
176 yield. A decrease in *C<sub>q</sub>* value has been observed, describing an increase in viral RNA  
177 concentration (Table 4). Furthermore, 56 samples collected and received in laboratory from  
178 April 6, 2020 to April 28, 2020 for polio diagnostics were also tested for detection of SARs-CoV-  
179 2, out which 14 (24%) were positive. One sample was collected from the drain of a Rawalpindi  
180 Institute of Urology (RIU), a COVID-19 patient quarantine center, while other from a drain  
181 having catchment area with recent history of COVID-19 patients. Both collection sites are in  
182 district Rawalpindi. These samples were found positive for SARs-COV-2 RNA on RT-qPCR.

183 The sample collected from the drain of RIU, Rawalpindi was also subjected for partial  
184 sequencing of SARs-CoV-2 ORF-1a. Nucleotide sequence of partial SARs-CoV-2 ORF 1a is  
185 submitted in gene bank under accession number MT539157.

## 186 Discussion:

187 The role of environmental surveillance in supporting Global Polio Eradication Initiative has  
188 already been acknowledged (Kroiss et al. 2018). The environmental surveillance can be used as  
189 supplemental tool for detection pathogens circulating within the community. Wastewater  
190 provides a near-real-time data as it constantly collects feces, urine and traces of sputum that  
191 can contain SARs-CoV-2 shed by the infected individuals. Viral load estimation in COVID-19  
192 positive patients are still uncertain, however, recently N. Zhang *et al.* suggests levels as high as  
193 600,000 viral genomes per ml of fecal material (Wu FQ 2020). Similarly another study reported  
194 approximately 30,00,000 viral particles in a single fecal sample (Wu FQ 2020). A previously  
195 published study on coronavirus reported that it remained infectious in water and sewage for days  
196 to weeks. Researchers reported time required for 99% reduction of virus infectivity was several

197 days at room temperature in pure water or wastewater (Guangbo Qu 2020). This adds another  
198 potential supplemental detection source of SARs-CoV-2 in communities.

199 In this study, we investigated the presence of SARs-CoV-2 RNA in wastewater using the existing  
200 poliovirus environment surveillance network that can be used in future as an early warning  
201 system for the dependent area. This definitely needs further evaluation and discussions;  
202 however, this seems to have a very interesting utilization in epidemiology. A total of 21 out of  
203 78 positive wastewater samples for SARs-CoV-2 RNA clearly indicates viral RNA shedding in  
204 stool of infected individuals. Currently, there is no evidence of infection transmission of SARs-  
205 COV-2 or related SARs-Corona via wastewater (Ahmed et al. 2020).

206 We used three commercially available kits and Published E-Gene detection assay for surety and  
207 confirmatory of positivity. Analyzing table 3, samples collected from Quetta district at two  
208 different time intervals indicates COVID-19 prevalence and surge in infected individuals. This  
209 can be assumed from the decrease in *C<sub>q</sub>* value in wastewater sample collected two weeks after.  
210 Detection of SARs-COV-2 RNA in two specific wastewater samples collected from areas with  
211 recent history of COVID-19 patients clearly explain that wastewater testing for COVID-19 can be  
212 used as an early warning system. Likewise, SARs-COV-2 RNA positive samples from RIU,  
213 Rawalpindi and an area in Rawalpindi with COVID patients further strengthen the findings and  
214 use of this tool in future. This surveillance system can picks up vast majority of infected  
215 individuals with SARs-CoV-2 who do not present symptoms for the disease (Ahmed et al. 2020).  
216 Furthermore, sequence data of partial ORF 1a generated from ICT-04 also reinforce our findings  
217 that SARs-CoV-2 can be detected in wastewater in Pakistan. Interestingly, the additional extra  
218 centrifugation step before viral RNA extraction seems to be encouraging in increasing the yield  
219 of viral RNA. This can be obvious from the data presented in table 4.

220 The surveillance through wastewater can be useful in remote or confined communities,  
221 however, further studies are needed on virus concentration and detection assay to increase the  
222 sensitivity. This has an epidemiologic potential for early detection of high burden area in  
223 advance; and heavily populated areas where door-to-door tracing may not be possible. This  
224 may also be more relevant to the developing countries with limited molecular testing.



225 Development of highly sensitive assay will be an indicator for virus monitoring and to provide  
226 early warning signs.

## 227 Conclusion:

228 SARS-CoV-2 detection in wastewater using RT-qPCR assay, confirmed by sequencing, is a  
229 milestone in the field of epidemiology. The study finding indicates that environmental  
230 surveillance through wastewater could be used as early warning system to monitor viral  
231 tracking and circulation in cities with lower COVID-19 disease burden or setting where person  
232 to person testing is limited. The virus concentration and detection method in wastewater needs  
233 attention to increase sensitivity of detection of SARS-CoV-2 in wastewater.

## 234 References:

- 235 Adhikari SP, Meng S, Wu YJ, Mao YP, Ye RX, Wang QZ, et al. 2020. Epidemiology, causes, clinical  
236 manifestation and diagnosis, prevention and control of coronavirus disease (covid-19) during the early  
237 outbreak period: A scoping review. *Infect Dis Poverty* 9:29.
- 238 Ahmed W, Angel N, Edson J, Bibby K, Bivins A, O'Brien JW, et al. 2020. First confirmed detection of sars-  
239 cov-2 in untreated wastewater in australia: A proof of concept for the wastewater surveillance of covid-  
240 19 in the community. *Sci Total Environ* 728:138764.
- 241 Casanova L, Rutala WA, Weber DJ, Sobsey MD. 2009. Survival of surrogate coronaviruses in water.  
242 *Water Res* 43:1893-1898.
- 243 Cheng PK, Wong DA, Tong LK, Ip SM, Lo AC, Lau CS, et al. 2004. Viral shedding patterns of coronavirus in  
244 patients with probable severe acute respiratory syndrome. *Lancet* 363:1699-1700.
- 245 Corman VM, Landt O, Kaiser M, Molenkamp R, Meijer A, Chu DK, et al. 2020. Detection of 2019 novel  
246 coronavirus (2019-ncov) by real-time rt-pcr. *Euro Surveill* 25.
- 247 de Groot RJ, Baker SC, Baric RS, Brown CS, Drosten C, Enjuanes L, et al. 2013. Middle east respiratory  
248 syndrome coronavirus (mers-cov): Announcement of the coronavirus study group. *J Virol* 87:7790-7792.
- 249 Guangbo Qu XL, Ligang Hu, and Guibin Jiang. 2020. An imperative need for research on the role of  
250 environmental factors in transmission of novel coronavirus (covid-19). *Environmental Science &*  
251 *Technology* 54:3730-3732.
- 252 Hui DS, Chan MC, Wu AK, Ng PC. 2004. Severe acute respiratory syndrome (sars): Epidemiology and  
253 clinical features. *Postgrad Med J* 80:373-381.
- 254 JHU. 2020. Covid-19 dashboard by the center for systems science and engineering (csse) at johns  
255 hopkins university (jhu). Available: <https://coronavirus.jhu.edu/map.html>.
- 256 Kroiss SJ, Ahmadzai M, Ahmed J, Alam MM, Chabot-Couture G, Famulare M, et al. 2018. Assessing the  
257 sensitivity of the polio environmental surveillance system. *PLoS One* 13:e0208336.
- 258 Peiris JS, Chu CM, Cheng VC, Chan KS, Hung IF, Poon LL, et al. 2003. Clinical progression and viral load in  
259 a community outbreak of coronavirus-associated sars pneumonia: A prospective study. *Lancet*  
260 361:1767-1772.
- 261 Ramadan N, Shaib H. 2019. Middle east respiratory syndrome coronavirus (mers-cov): A review. *Germs*  
262 9:35-42.
- 263 Richman DD WR, Hayden FG, eds. 2016. *Clinical virology*. 4th ed.
- 264 Roman Woelfel VMC, Wolfgang Guggemos, Michael Seilmaier, Sabine Zange, Marcel A Mueller, Daniela  
265 Niemeyer, Patrick Vollmar, Camilla Rothe, Michael Hoelscher, Tobias Bleicker, Sebastian Bruenink, Julia

- 266 Schneider, Rosina Ehmann, Katrin Zwirgmaier, Christian Drosten, Clemens Wendtner. 2020. Clinical  
267 presentation and virological assessment of hospitalized cases of coronavirus disease 2019 in a travel-  
268 associated transmission cluster. medRxiv.
- 269 Shirato K, Nao N, Katano H, Takayama I, Saito S, Kato F, et al. 2020. Development of genetic diagnostic  
270 methods for novel coronavirus 2019 (ncov-2019) in japan. Jpn J Infect Dis.
- 271 UNICEF W. 2020. Water, sanitation, hygiene, and waste management for the covid-19 virus: Interim  
272 guidance.
- 273 WHO. 2003. Guidelines for environmental surveillance of poliovirus circulation. Available:  
274 [http://polioeradication.org/wp-content/uploads/2016/07/WHO\\_V-B\\_03.03\\_eng.pdf](http://polioeradication.org/wp-content/uploads/2016/07/WHO_V-B_03.03_eng.pdf).
- 275 WHO. 2015. Guidelines on environmental surveillance for detection of poliovirus.
- 276 WHO. 2020a. Coronavirus disease (covid-19) outbreak. Available:  
277 <https://www.who.int/westernpacific/emergencies/covid-19>.
- 278 WHO. 2020b. Who statement regarding cluster of pneumonia cases in wuhan, china. Available:  
279 <https://www.who.int/china/news/detail/09-01-2020-who-statement-regarding-cluster-of-pneumonia-cases-in-wuhan-china>.
- 280
- 281 WHO. 2020c. Available: <https://www.who.int/dg/speeches/details/who-director-general-s-opening-remarks-at-the-media-briefing-on-covid-19---11-march-2020>.
- 282
- 283 Wu FQ XA, Zhang JB, Gu XQ, Lee WL, Kauffman K, Hanage WP, Matus M, Ghaeli N, Endo N, Duvall C,  
284 Moniz K, Erickson TB, Chai PR, Thompson J, Alm EJ. 2020. Sars-cov-2 titers in wastewater are higher than  
285 expected from clinically confirmed cases. medRxiv.

**Table 1: Primers and probes, real time- RT-PCR for 2019 SARS-CoV2**

|        | Oligonucleotide | Sequence <sup>a</sup>              | Concentration / Reaction |
|--------|-----------------|------------------------------------|--------------------------|
| E gene | E_Sarbeco_F     | ACAGGTACGTTAATAGTTAATAGCGT         | Use 400 nm               |
|        | E_Sarbeco_P1    | FAM-ACACTAGCCATCCTTACTGCGCTTCG-BBQ | Use 200 nm               |
|        | E_Sarbeco_R     | ATATTGCAGCAGTACGCACACA             | Use 400 nm               |

<sup>a</sup> FAM: 6-carboxyfluorescein; BBQ: blackberry quencher.

**Table 2: Details wastewater samples tested for SARS-CoV2 at Virology Department, National Institute of Health, Islamabad, Pakistan**

| Lab# | Collection Site                    | Drainage Type   | District    | Date Collection | EPI Week | COVID-19 Results |
|------|------------------------------------|-----------------|-------------|-----------------|----------|------------------|
| 186  | AQILPUR & ASLAM TOWN               | PUMPING STATION | RAJANPUR    | 20-Mar-20       | Week12   | NOT DETECTED     |
| 189  | SUR PUL                            | OPEN DRAIN      | QUETTA      | 20-Mar-20       | Week12   | DETECTED         |
| 197  | FAQIRABAD                          | OPEN DRAIN      | KOHAT       | 30-Mar-20       | Week14   | NOT DETECTED     |
| 198  | HAZARA COLONY                      | OPEN DRAIN      | KURRAM      | 30-Mar-20       | Week14   | NOT DETECTED     |
| 199  | COMPOSITE BUS STAND & MODC         | OPEN DRAIN      | DIKHAN      | 30-Mar-20       | Week14   | NOT DETECTED     |
| 200  | COMPOSITE SHERPAO & ZAFARABAD      | OPEN DRAIN      | DIKHAN      | 30-Mar-20       | Week14   | NOT DETECTED     |
| 201  | BAGO ROAD & BAQIRABAD              | PUMPING STATION | KAMBAR      | 31-Mar-20       | Week14   | NOT DETECTED     |
| 202  | QILA SHEIKHUPURA & PS BAHRIAN WALA | PUMPING STATION | SHEIKHUPURA | 2-Apr-20        | Week14   | NOT DETECTED     |
| 203  | RAILWAY PUL                        | OPEN DRAIN      | QUETTA      | 1-Apr-20        | Week14   | DETECTED         |
| 207  | NALA BHAIR                         | OPEN DRAIN      | SIALKOT     | 2-Apr-20        | Week14   | NOT DETECTED     |
| 204  | KALAPUL MURRE ROAD                 | OPEN DRAIN      | ABOTABAD    | 3-Apr-20        | Week14   | NOT DETECTED     |
| 205  | HINJAL & NOORABAD                  | OPEN DRAIN      | BANNU       | 3-Apr-20        | Week14   | NOT DETECTED     |
| 206  | PUMPING S.36 AHMAD NAGAR           | PUMPING STATION | FAISALABAD  | 3-Apr-20        | Week14   | DETECTED         |
| 208  | TURWA                              | OPEN DRAIN      | PISHIN      | 4-Apr-20        | Week14   | NOT DETECTED     |
| 209  | ARMY KAZIBA                        | OPEN DRAIN      | KABDULAH    | 4-Apr-20        | Week14   | NOT DETECTED     |
| 210  | GULSHAN RAVI STATION               | PUMPING STATION | LAHORE      | 6-Apr-20        | Week15   | NOT DETECTED     |
| 211  | SABZI MANDI                        | OPEN DRAIN      | DG KHAN     | 6-Apr-20        | Week15   | NOT DETECTED     |
| 212  | SANGOT & THOTHAL                   | OPEN DRAIN      | MIRPUR      | 6-Apr-20        | Week15   | NOT DETECTED     |
| 219  | WALKWAY NEELUM & OLD NEELUM BRIDGE | OPEN DRAIN      | MUZAFARABAD | 6-Apr-20        | Week15   | NOT DETECTED     |
| 213  | MIANI PUMPING STATION              | PUMPING STATION | SUKKUR      | 7-Apr-20        | Week15   | NOT DETECTED     |
| 214  | SURAJ MIANI                        | PUMPING STATION | MULTAN      | 8-Apr-20        | Week15   | NOT DETECTED     |
| 215  | FRONTIER COLONY                    | OPEN DRAIN      | KARACHI     | 8-Apr-20        | Week15   | DETECTED         |
| 216  | ORANGI NALLA                       | OPEN DRAIN      | KARACHI     | 8-Apr-20        | Week15   | NOT DETECTED     |
| 217  | QASBA COLONY                       | OPEN DRAIN      | KARACHI     | 8-Apr-20        | Week15   | DETECTED         |

|        |                               |                 |            |           |        |              |
|--------|-------------------------------|-----------------|------------|-----------|--------|--------------|
| 218    | BANGALI PARA                  | OPEN DRAIN      | KARACHI    | 8-Apr-20  | Week15 | NOT DETECTED |
| 221    | MUHAMMAD KHAN COLONY          | OPEN DRAIN      | KARACHI    | 9-Apr-20  | Week15 | NOT DETECTED |
| 222    | KORANGI NALLA                 | OPEN DRAIN      | KARACHI    | 9-Apr-20  | Week15 | NOT DETECTED |
| ICT-01 | SECTOR I-10/4                 | OPEN DRAIN      | Islamabad  | 9-Apr-20  | Week15 | DETECTED     |
| ICT-02 | SECTOR I-10/1                 | OPEN DRAIN      | Islamabad  | 9-Apr-20  | Week15 | DETECTED     |
| 224    | HIJRAT COLONY PIDC COLONY     | OPEN DRAIN      | KARACHI    | 10-Apr-20 | Week15 | NOT DETECTED |
| 220    | KONRA CHINA & SPAISHTA        | OPEN DRAIN      | WAZIR-S    | 10-Apr-20 | Week15 | NOT DETECTED |
| 223    | SABZI MANDI                   | OPEN DRAIN      | Islamabad  | 13-Apr-20 | Week16 | NOT DETECTED |
| 225    | DHOKE DALLAL                  | OPEN DRAIN      | RAWALPINDI | 13-Apr-20 | Week16 | DETECTED     |
| 226    | SAFDAR ABAD                   | OPEN DRAIN      | RAWALPINDI | 13-Apr-20 | Week16 | DETECTED     |
| 227    | MAIN DISPOSAL                 | PUMPING STATION | DG KHAN    | 13-Apr-20 | Week16 | NOT DETECTED |
| 228    | OUTFALL STATION-G             | PUMPING STATION | LAHORE     | 13-Apr-20 | Week16 | DETECTED     |
| 229    | OUTFALL STATION-H             | PUMPING STATION | LAHORE     | 13-Apr-20 | Week16 | NOT DETECTED |
| 230    | OUTFALL STATION-F             | PUMPING STATION | LAHORE     | 13-Apr-20 | Week16 | NOT DETECTED |
| 231    | COMPOSITE SHERPAO & ZAFARABAD | OPEN DRAIN      | DIKHAN     | 13-Apr-20 | Week16 | NOT DETECTED |
| 232    | COMPSITE BUS STAND & MODC     | OPEN DRAIN      | DIKHAN     | 13-Apr-20 | Week16 | NOT DETECTED |
| 233    | RASHID MINHAS RD LAY          | OPEN DRAIN      | KARACHI    | 13-Apr-20 | Week16 | NOT DETECTED |
| 234    | HAJI MUREED GOTH              | OPEN DRAIN      | KARACHI    | 13-Apr-20 | Week16 | NOT DETECTED |
| 235    | TAWOOS ABAD                   | OPEN DRAIN      | QUETTA     | 12-Apr-20 | Week16 | NOT DETECTED |
| 236    | TULSIDAS PUMPING STATION      | PUMPING STATION | HYDERABAD  | 13-Apr-20 | Week16 | NOT DETECTED |
| 237    | KHAMISO GOTH                  | OPEN DRAIN      | KARACHI    | 14-Apr-20 | Week16 | NOT DETECTED |
| 238    | SOHRAB GOTH                   | OPEN DRAIN      | KARACHI    | 14-Apr-20 | Week16 | NOT DETECTED |
| 240    | MAKKA PUMPING STATION         | PUMPING STATION | SUKKUR     | 14-Apr-20 | Week16 | NOT DETECTED |
| 241    | MACHAR COLONY                 | OPEN DRAIN      | KARACHI    | 14-Apr-20 | Week16 | NOT DETECTED |
| 242    | BAGO ROAD & BAQIRABAD         | PUMPING STATION | KAMBAR     | 14-Apr-20 | Week16 | NOT DETECTED |
| 243    | SADDAR PUMPING STATION        | PUMPING STATION | JACOBABAD  | 14-Apr-20 | Week16 | NOT DETECTED |
| 244    | MASAN MULLAH                  | PUMPING STATION | DADU       | 14-Apr-20 | Week16 | DETECTED     |

|        |                                     |                 |                |           |        |              |
|--------|-------------------------------------|-----------------|----------------|-----------|--------|--------------|
| 245    | LANDHI BAKHTAWAR VILLAGE            | OPEN DRAIN      | KARACHI        | 15-Apr-20 | Week16 | DETECTED     |
| 248    | HADI PACKET                         | OPEN DRAIN      | KILLA ABDULLAH | 15-Apr-20 | Week16 | DETECTED     |
| 246    | CHAKORA NULLA                       | OPEN DRAIN      | KARACHI        | 15-Apr-20 | Week16 | NOT DETECTED |
| 239    | RAJKOT & SANSI ROAD & PEOPLE COLONY | OPEN DRAIN      | GUJARANWALA    | 15-Apr-20 | Week16 | NOT DETECTED |
| 252    | GANJ MOHALLA                        | OPEN DRAIN      | ZHOB           | 16-Apr-20 | Week16 | NOT DETECTED |
| 247    | CHAK & PAR HOTI                     | OPEN DRAIN      | MARDAN         | 17-Apr-20 | Week16 | NOT DETECTED |
| ICT-04 | RAWALPINDI INSTITUTE OF UROLOGY     | OPEN DRAIN      | RAWALPINDI     | 17-Apr-20 | Week16 | DETECTED     |
| ICT-06 | DHOKE KASHMIRIAN                    | OPEN DRAIN      | RAWALPINDI     | 17-Apr-20 | Week16 | DETECTED     |
| 249    | PUMPING S.36 AHMAD NAGAR            | PUMPING STATION | FAISALABAD     | 17-Apr-20 | Week16 | NOT DETECTED |
| 250    | MILL COLONY                         | OPEN DRAIN      | NOWSHERA       | 17-Apr-20 | Week16 | DETECTED     |
| 251    | SHAHEEN MUSLIM TOWN                 | OPEN DRAIN      | PESHAWAR       | 17-Apr-20 | Week16 | DETECTED     |
| 253    | RASALA LINE                         | OPEN DRAIN      | LORALAI        | 17-Apr-20 | Week16 | NOT DETECTED |
| 254    | MULTAN ROAD STATION                 | PUMPING STATION | LAHORE         | 20-Apr-20 | Week17 | DETECTED     |
| 255    | AQILPUR & ASLAM TOWN                | PUMPING STATION | RAJANPUR       | 20-Apr-20 | Week17 | NOT DETECTED |
| 256    | SUR PUL                             | OPEN DRAIN      | QUETTA         | 20-Apr-20 | Week17 | NOT DETECTED |
| 257    | LABOUR NALA                         | OPEN DRAIN      | DERA BUGHTI    | 20-Apr-20 | Week17 | NOT DETECTED |
| 264    | KATAN PUL                           | OPEN DRAIN      | KHUZDAR        | 20-Apr-20 | Week17 | NOT DETECTED |
| 258    | WAPDA COLONY                        | OPEN DRAIN      | NASIRABAD      | 20-Apr-20 | Week17 | NOT DETECTED |
| 261    | ALI TOWN                            | PUMPING STATION | MULTAN         | 22-Apr-20 | Week17 | NOT DETECTED |
| 262    | SILAN WALI                          | PUMPING STATION | SARGODAHA      | 24-Apr-20 | Week17 | NOT DETECTED |
| 263    | LARA MA                             | OPEN DRAIN      | PESHAWAR       | 24-Apr-20 | Week17 | NOT DETECTED |
| 265    | KALAPUL MURRE ROAD                  | OPEN DRAIN      | ABOTABAD       | 27-Apr-20 | Week18 | DETECTED     |
| 266    | FAQIRABAD                           | OPEN DRAIN      | KOHAT          | 27-Apr-20 | Week18 | DETECTED     |
| 267    | SANGOT & THOTHAL                    | OPEN DRAIN      | MIRPUR         | 27-Apr-20 | Week18 | NOT DETECTED |
| 268    | LALBAGH & TIBA BAHADUR              | PUMPING STATION | BAHAWALPUR     | 28-Apr-20 | Week18 | NOT DETECTED |
| 269    | JATAK KILLI & TAKHTHANI             | OPEN DRAIN      | QUETTA         | 28-Apr-20 | Week18 | DETECTED     |
| 270    | KOTLA ABDUL FATAH                   | PUMPING STATION | MULTAN         | 28-Apr-20 | Week18 | NOT DETECTED |

\* Collection Site name is designated as per drainage area or collection vicinity

**Table 3: Wastewater samples collected during March 20, 2020 to April 09, 2020. A comparative analysis**

| Sample ID | Drainage Type   | Epi Week | District    | Date Collection | Kit 1 (ORF 1+ Ngene) | Kit 2 (ORF 1ab+ Ngene) | Kit 3 (ORF1ab ) | Corman V. M. et. al Method (E Gene) | Final Results |
|-----------|-----------------|----------|-------------|-----------------|----------------------|------------------------|-----------------|-------------------------------------|---------------|
| 186       | PUMPING STATION | Week 12  | RAJANPUR    | 20-Mar-20       | ND                   | ND                     | ND              | ND                                  | ND            |
| 189       | OPEN DRAINAGE   | Week 12  | QUETTA      | 20-Mar-20       | +                    | +                      | ND              | +                                   | DETECTED      |
| 197       | OPEN DRAINAGE   | Week 14  | KOHAT       | 30-Mar-20       | ND                   | ND                     | ND              | ND                                  | ND            |
| 198       | OPEN DRAINAGE   | Week 14  | KURRAM      | 30-Mar-20       | ND                   | ND                     | ND              | ND                                  | ND            |
| 199       | PUMPING STATION | Week 14  | DIKHAN      | 30-Mar-20       | ND                   | ND                     | ND              | ND                                  | ND            |
| 200       | OPEN DRAINAGE   | Week 14  | DIKHAN      | 30-Mar-20       | ND                   | ND                     | ND              | ND                                  | ND            |
| 201       | OPEN DRAINAGE   | Week 14  | KAMBAR      | 31-Mar-20       | ND                   | ND                     | ND              | ND                                  | ND            |
| 202       | PUMPING STATION | Week 14  | SHEIKHUPURA | 1-Apr-20        | ND                   | ND                     | ND              | ND                                  | ND            |
| 203       | OPEN DRAINAGE   | Week 14  | QUETTA      | 1-Apr-20        | +                    | +                      | +               | +                                   | DETECTED      |
| 204       | OPEN DRAINAGE   | Week 14  | ABOTABAD    | 3-Apr-20        | ND                   | ND                     | ND              | ND                                  | ND            |
| 205       | OPEN DRAINAGE   | Week 14  | BANNU       | 3-Apr-20        | +                    | +                      | +               | +                                   | DETECTED      |
| 206       | PUMPING STATION | Week 14  | FAISALABAD  | 3-Apr-20        | +                    | +                      | ND              | +                                   | DETECTED      |
| 207       | OPEN DRAINAGE   | Week 14  | SIALKOT     | 2-Apr-20        | ND                   | ND                     | ND              | ND                                  | ND            |
| 208       | OPEN DRAINAGE   | Week 14  | PISHIN      | 2-Apr-20        | ND                   | ND                     | ND              | ND                                  | ND            |
| 209       | OPEN DRAINAGE   | Week 14  | KABDULAH    | 4-Apr-20        | ND                   | ND                     | ND              | ND                                  | ND            |
| 210       | PUMPING STATION | Week 15  | LAHORE      | 6-Apr-20        | ND                   | ND                     | ND              | ND                                  | ND            |
| 211       | PUMPING STATION | Week 15  | DGKHAN      | 6-Apr-20        | ND                   | ND                     | ND              | ND                                  | ND            |
| 212       | OPEN DRAINAGE   | Week 15  | MIRPUR      | 6-Apr-20        | ND                   | ND                     | ND              | ND                                  | ND            |
| ICT-01    | OPEN DRAINAGE   | Week 15  | ISLAMABAD   | 9-Apr-20        | +                    | +                      | +               | +                                   | DETECTED      |
| ICT-02    | OPEN DRAINAGE   | Week 15  | ISLAMABAD   | 9-Apr-20        | +                    | +                      | +               | +                                   | DETECTED      |

\* Collection Site name is designated as per the drainage area or collection vicinity  
 ND Not detected

**Table 4: Sample preparation without and with centrifugation before viral RNA Extraction. Comparison among the Cq values**

| Lab#   | Collection Site                 | District   | Date Collection | EPI Week | Without Centrifugation step |    |         |    |        | With Centrifugation step |    |         |    |              |
|--------|---------------------------------|------------|-----------------|----------|-----------------------------|----|---------|----|--------|--------------------------|----|---------|----|--------------|
|        |                                 |            |                 |          | N-GENE                      | Cq | ORF-1ab | Cq | RESULT | N-GENE                   | Cq | ORF-1ab | Cq | RESULT       |
| 215    | Frontier Colony                 | Karachi    | 8-Apr-20        | Week15   | +                           | 37 | +       | 38 | +      | +                        | 35 | +       | 37 | DETECTED     |
| 217    | Qasba Colony                    | Karachi    | 8-Apr-20        | Week15   | +                           | 38 | +       | 38 | +      | +                        | 36 | +       | 36 | DETECTED     |
| 218    | Bangali Para                    | Karachi    | 8-Apr-20        | Week15   | -                           |    | -       |    | ND     | -                        |    | -       |    | NOT DETECTED |
| 225    | Dhoke Dallal                    | Rawalpindi | 13-Apr-20       | Week16   | +                           | 38 | +       | 40 | +      | +                        | 34 | +       | 37 | DETECTED     |
| 226    | Safdarabad                      | Rawalpindi | 13-Apr-20       | Week16   | +                           | 36 | +       | 36 | +      | +                        | 33 | +       | 36 | DETECTED     |
| 228    | Outfall Station G               | Lahore     | 13-Apr-20       | Week16   | +                           | 38 | +       | 39 | +      | +                        | 29 | +       | 31 | DETECTED     |
| ICT-04 | Rawalpindi Institute of Urology | Rawalpindi | 17-Apr-20       | Week16   | +                           | 38 | +       | 39 | +      | +                        | 34 | +       | 37 | DETECTED     |
| ICT-06 | Dhoke Kashmirian                | Rawalpindi | 17-Apr-20       | Week16   | +                           | 39 | +       | 39 | +      | +                        | 36 | +       | 38 | DETECTED     |



## Figure Legends:

**Figure 1:** **A.** Map indicating environmental sampling sites. Each purple dot represents a wastewater collection site **B.** Map indicating the red marked districts with SARS-CoV-2 positive wastewater samples. Each orange dot represents a positive wastewater sample

**Figure 2:** Graphical representation of positive samples among tested samples

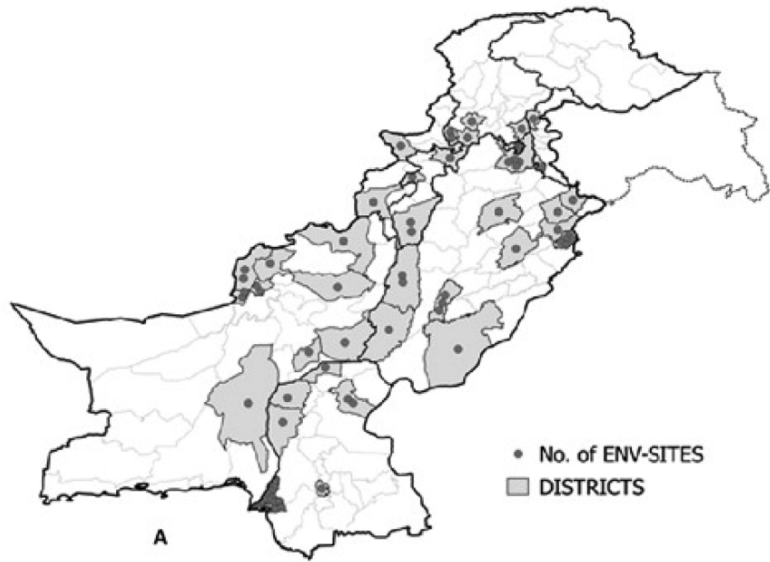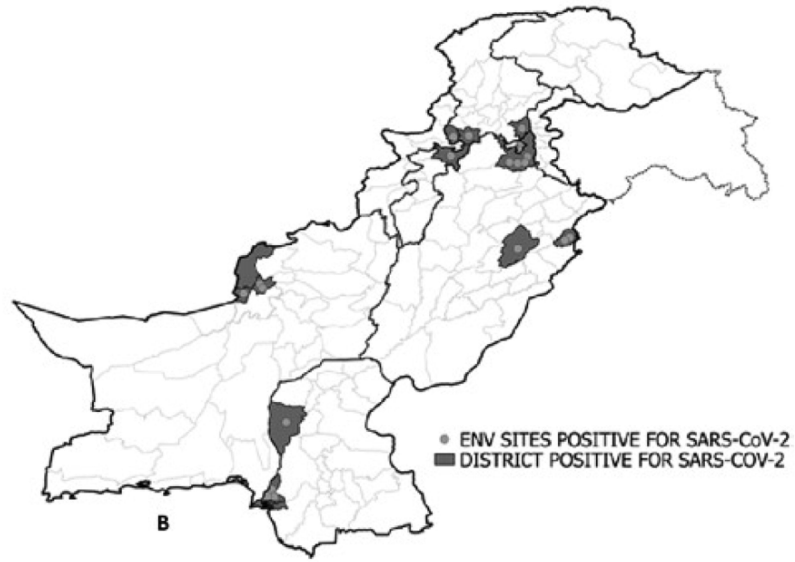

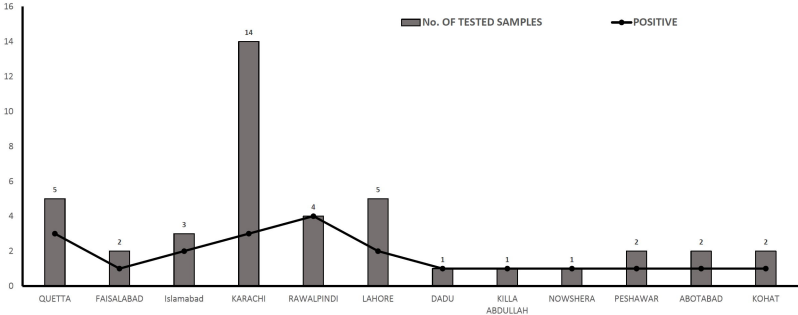

Source: https://medrxiv.org/content/10.1101/2020.06.03.20121426v3.full.pdf
